# Supplementary material for: SHARC meets TEQUILA: mixed quantum-classical dynamics on a quantum computer using a hybrid quantum-classical algorithm
Source: Royal Society of Chemistry journal article supplement (doi:10.1039/d4sc04987j), 2024-11-28

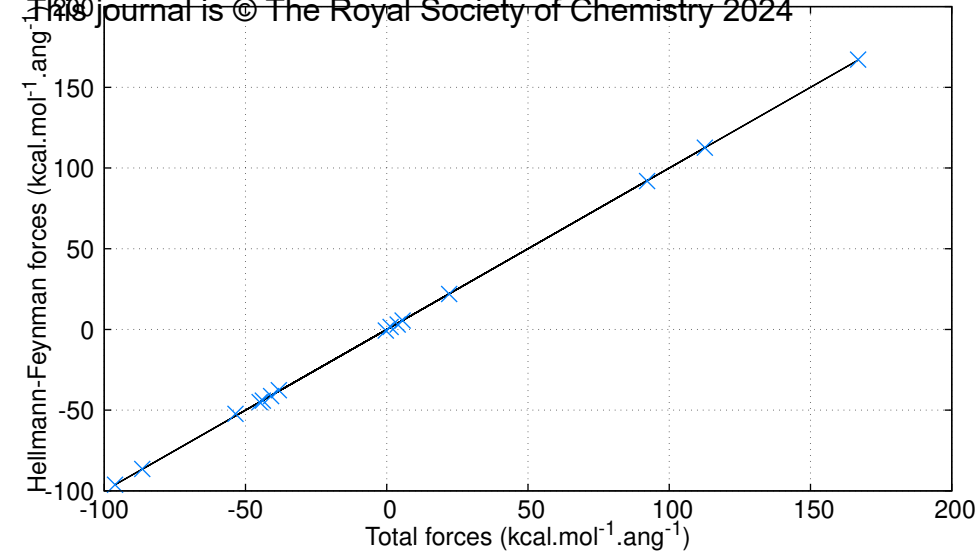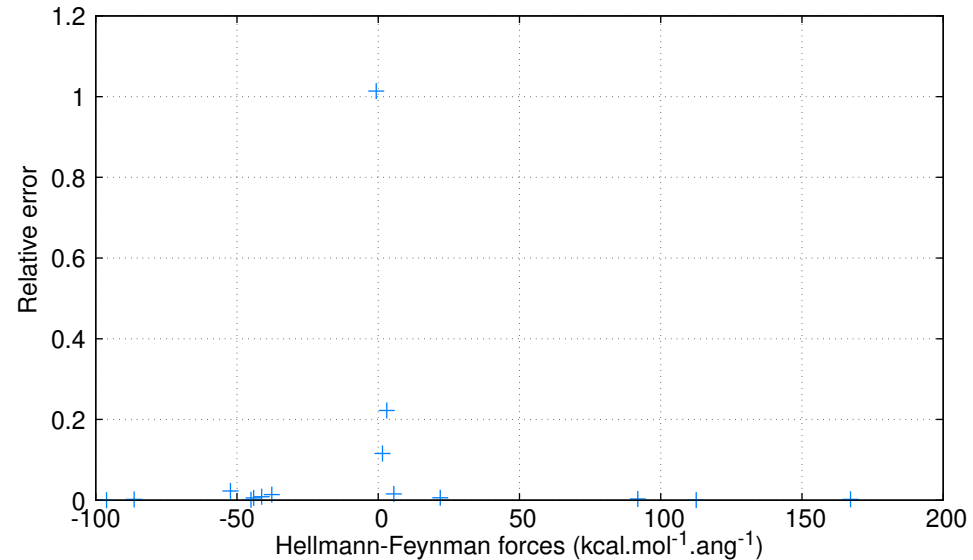

Supplement: d4sc04987j4.pdf [file d4sc04987j4.pdf]
